# Supplementary material for: Carbohydrate, Lipid, and Apolipoprotein Biomarkers in Blood and Risk of Thyroid Cancer: Findings from the AMORIS Cohort
Source: MDPI journal article supplement (doi:10.3390/cancers15020520), 2023-01-14
Supplement: s1 [file s1]

**Table S2** Incidence rates (IR) per 100,000 person-years and hazard ratio (HR) with 95% confidence interval (CI) of thyroid cancer per SD increase of blood biomarkers of lipid, carbohydrate, and apolipoprotein metabolism, analysis restricted to first blood samplings after overnight fasting.

| Biomarker                | N of cases | IR  | HR (95% CI) <sup>a</sup> |
|--------------------------|------------|-----|--------------------------|
| Glucose                  | 325        | 5.1 | 1.11 (0.99-1.24)         |
| TC                       | 340        | 5.2 | 0.95 (0.84-1.08)         |
| LDL-C                    | 140        | 5.2 | 0.93 (0.77-1.12)         |
| HDL-C                    | 139        | 5.2 | 0.83 (0.69-1.00)         |
| LDL-C/HDL-C <sup>b</sup> | 139        | 5.2 | 1.03 (0.87-1.22)         |
| TG <sup>b</sup>          | 341        | 5.2 | 1.04 (0.92-1.18)         |
| ApoA-I                   | 122        | 5.0 | 0.89 (0.73-1.08)         |
| ApoB                     | 111        | 4.8 | 1.01 (0.83-1.24)         |
| ApoB/ApoA-I <sup>b</sup> | 111        | 5.0 | 1.07 (0.87-1.31)         |

<sup>a</sup> Analyses were adjusted for sex, age at first blood sampling, fasting status at first blood sampling, occupational status, and country of birth.

<sup>b</sup> Logarithmic transformation (log2) was used to the variables of TG, LDL-C/HDL-C ratio, and ApoB/ApoA-I ratio.

Abbreviations: TC, total cholesterol; LDL-C, low-density lipoprotein cholesterol; HDL-C, high-density lipoprotein cholesterol; TG, triglycerides; ApoA-I, apolipoprotein A-I; ApoB, apolipoprotein B.
